# Supplementary material for: New and Interesting Fungi. 3
Source: PubMed Central journal article supplement — Fungal Syst Evol. 2020 May 12;6:157–231. doi: 10.3114/fuse.2020.06.09 (PMC7452156; doi:10.3114/fuse.2020.06.09), 2020-05-12
Supplement: fuse-2020-6-9-SF1.pdf [file fuse-2020-6-9-SF1.pdf]

**Figure S1**

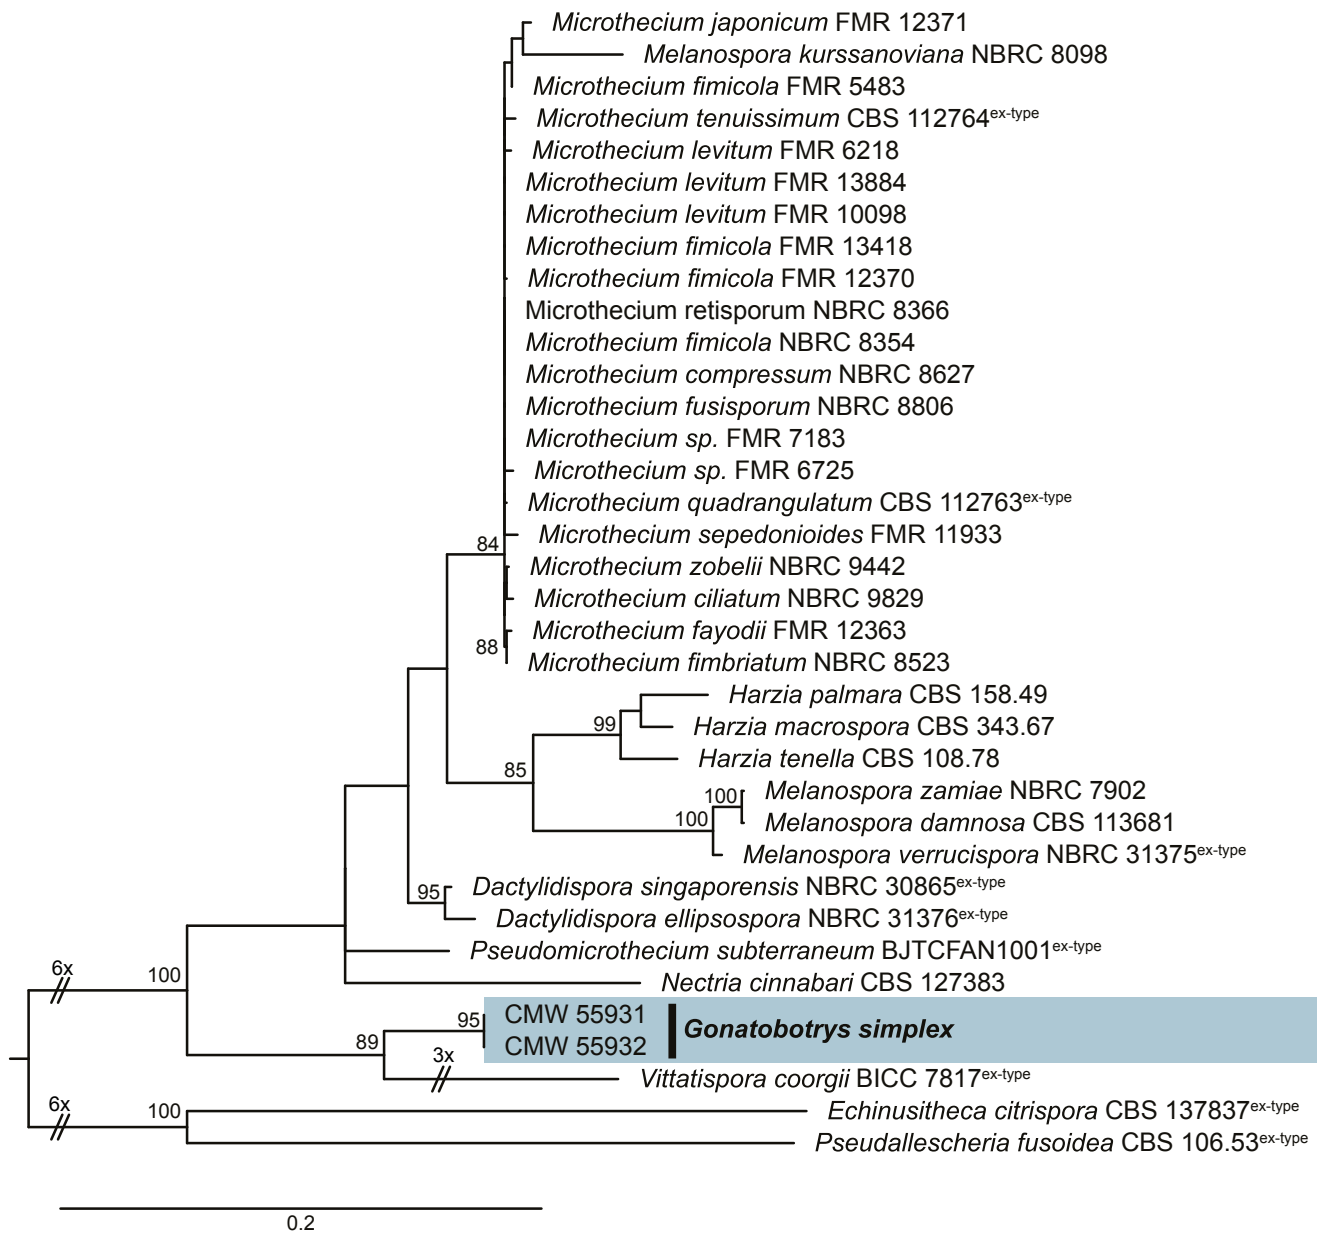

**Supplementary Fig 1.** Combined phylogeny based on LSU and ITS showing the placement of *Gonatobotrys simplex* in *Melanosporales* as a close relative of *Vittatispora*. Aligned data sets (MAFFT v. 7.450) were analysed using Maximum likelihood (IQ-TREE v. 1.6.12). Bootstrap support values ( $\geq 80\%$ ) are given above branches. The tree was rooted to *Echinusithea citrispora* and *Pseudallescheria fusoidea*.
